# Supplementary material for: Reusable solid-phase supports for oligonucleotides and antisense therapeuticsElectronic supplementary information (ESI) available: CGE data for octathymidine phosphodiester sequences on supports P1â€“5, P7, P9, and P11â€“13 PAGE data for phosphorothioate products, dimethoxytrityl analysis and UV measurements on supports P1â€“7, P9 and P15, step listing for ABI394 DNA synthesizer and CGE and HPLC data for phosporothioate syntheses on support P3. See http://www.rsc.org/suppdata/p1/b1/b105089n/
Source: Royal Society of Chemistry journal article supplement (doi:10.1039/b105089n), 2001-09-27
Supplement: b105089n_2.doc [file b105089n_2.doc]

**Supplementary data**

Polyacrylamide gel electrophoresis (PAGE) of the crude Isis 2302 phosphorothioate products prepared on reusable supports **P1-7**, **P9**, and  **P15**. 24% polyacrylamide/7M urea gels visualized by UV shadowing.

**Figure S-2a**. PAGE analysis of Isis 2302 products prepared on reusable support **P1**

**Figure S-2b**. PAGE analysis of Isis 2302 products prepared on reusable support **P2**

**Figure S-2c**. PAGE analysis of Isis 2302 products prepared on reusable support **P3**

**Figure S-2d.** PAGE analysis of Isis 2302 products prepared on reusable support **P4**

**Figure S-2e**. PAGE analysis of Isis 2302 products prepared on reusable support **P5**

**Figure S-2f.** PAGE analysis of Isis 2302 products prepared on reusable support **P6**

**Figure S-2g.** PAGE analysis of Isis 2302 products prepared on reusable support **P7**

**Figure S-2h.** PAGE analysis of Isis 2302 products prepared on reusable support **P9**

**Figure S-2i**. PAGE analysis of Isis 2302 products prepared on reusable support **P15**
