# Supplementary material for: Reusable solid-phase supports for oligonucleotides and antisense therapeuticsElectronic supplementary information (ESI) available: CGE data for octathymidine phosphodiester sequences on supports P1â€“5, P7, P9, and P11â€“13 PAGE data for phosphorothioate products, dimethoxytrityl analysis and UV measurements on supports P1â€“7, P9 and P15, step listing for ABI394 DNA synthesizer and CGE and HPLC data for phosporothioate syntheses on support P3. See http://www.rsc.org/suppdata/p1/b1/b105089n/
Source: Royal Society of Chemistry journal article supplement (doi:10.1039/b105089n), 2001-09-27
Supplement: b105089n_3.doc [file b105089n_3.doc]

**Supplementary data**

Multiple Isis 2302 phosphorothioate syntheses on reusable supports **P1-7**, **P9**, and **P15**. Data from quantitative dimethoxytrityl analysis and UV measurements.

| **Synthesis** | **Loading** | **Yield of** | **Overall** | **Average** | **Crude** |
| --- | --- | --- | --- | --- | --- |
| **Number** | **(mol/g)** | **1st amidite** | **Yield** | **Yield** | **A260 units/g** |
| 1 | 73.7 | 100% | 55% | 96.7% | 7531 |
| 2 | 61.7 | 99% | 63% | 97.4% | 7593 |
| 3 | 61.4 | 99% | 64% | 97.6% | 7531 |
| 4 | 64.8 | 101% | 63% | 97.4% | 7654 |
| 5 | 55.5 | 101% | 69% | 98.0% | 6790 |
| 6 | 55.2 | 104% | 68% | 97.9% | 6852 |
| 7 | 53.7 | 99% | 71% | 98.1% | 5741 |
| 8 | 60.4 | 106% | 65% | 97.6% | 5926 |
| 9 | 58.3 | 100% | 57% | 97.0% | 4753 |
| 10 | 59.8 | 105% | 48% | 96.0% | 3642 |
| 11 | 50.5 | 89% | 34% | 94.1% | 2778 |
| 12 | 48.9 | 99% | 24% | 92.4% | 2346 |

**Table S-1a**. Data for multiple Isis 2302 phosphorothioate syntheses on reusable support **P1**

| **Synthesis** | **Loading** | **Yield of** | **Overall** | **Average** | **Crude** |
| --- | --- | --- | --- | --- | --- |
| **Number** | **(mol/g)** | **1st amidite** | **Yield** | **Yield** | **A260 units/g** |
| 1 | 57.2 | 105% | 70% | 98.0% | 7630 |
| 2 | 58.3 | 100% | 71% | 98.1% | 7678 |
| 3 | 54.3 | 101% | 72% | 98.2% | 6588 |
| 4 | 56.2 | 101% | 73% | 98.3% | 6967 |
| 5 | 53.9 | 102% | 75% | 98.4% | 6682 |
| 6 | 53.8 | 104% | 77% | 98.6% | 6682 |
| 7 | 54.3 | 107% | 80% | 98.8% | 6114 |
| 8 | 61.7 | 103% | 68% | 97.9% | 5166 |
| 9 | 51.1 | 102% | 52% | 96.5% | 3460 |
| 10 | 48.1 | 95% | 33% | 94.1% | 2417 |
| 11 | 55.8 | 88% | 25% | 92.5% | 2701 |
| 12 | 45.9 | 90% | 22% | 91.9% | 1848 |

**Table S-1b.** Data for multiple Isis 2302 phosphorothioate syntheses on reusable support **P2**

| **Synthesis** | **Loading** | **Yield of** | **Overall** | **Average** | **Crude** |
| --- | --- | --- | --- | --- | --- |
| **Number** | **(mol/g)** | **1st amidite** | **Yield** | **Yield** | **A260 units/g** |
| 1 | 72.4 | 96% | 60% | 97.2% | 8346 |
| 2 | 67.7 | 99% | 62% | 97.4% | 7744 |
| 3 | 65.1 | 100% | 63% | 97.5% | 8271 |
| 4 | 67.4 | 100% | 61% | 97.3% | 7970 |
| 5 | 63.7 | 100% | 64% | 97.6% | 8120 |
| 6 | 64.0 | 102% | 64% | 97.5% | 8120 |
| 7 | 61.5 | 101% | 68% | 97.9% | 7444 |
| 8 | 61.4 | 104% | 69% | 98.0% | 7368 |
| 9 | 60.2 | 105% | 70% | 98.0% | 6692 |
| 10 | 56.7 | 107% | 66% | 97.7% | 6165 |
| 11 | 55.4 | 107% | 64% | 97.5% | 5188 |
| 12 | 53.9 | 105% | 60% | 97.2% | 4662 |

**Table S-1c**. Data for multiple Isis 2302 phosphorothioate syntheses on reusable support **P3**

| **Synthesis** | **Loading** | **Yield of** | **Overall** | **Average** | **Crude** |
| --- | --- | --- | --- | --- | --- |
| **Number** | **(mol/g)** | **1st amidite** | **Yield** | **Yield** | **A260 units/g** |
| 1 | 30.1 | 101% | 88% | 99.3% | 3610 |
| 2 | 34.7 | 99% | 86% | 99.1% | 4302 |
| 3 | 35.2 | 98% | 87% | 99.2% | 4217 |
| 4 | 36.8 | 99% | 87% | 99.2% | 4540 |
| 5 | 37.8 | 101% | 87% | 99.2% | 4830 |
| 6 | 35.4 | 104% | 92% | 99.5% | 4557 |
| 7 | 34.7 | 117% | 93% | 99.6% | 4628 |
| 8 | 35.5 | 127% | 91% | 99.5% | 4622 |
| 9 | 31.0 | 142% | 90% | 99.4% | 4296 |
| 10 | 32.9 | 142% | 67% | 97.8% | 3730 |
| 11 | 36.6 | 140% | 42% | 95.3% | 3387 |
| 12 | 32.5 | 155% | 30% | 93.6% | 2754 |

**Table S-1d**. Data for multiple Isis 2302 phosphorothioate syntheses on reusable support **P4**

| **Synthesis** | **Loading** | **Yield of** | **Overall** | **Average** | **Crude** |
| --- | --- | --- | --- | --- | --- |
| **Number** | **(mol/g)** | **1st amidite** | **Yield** | **Yield** | **A260 units/g** |
| 1 | 75.2 | 100% | 58% | 97.0% | 8014 |
| 2 | 78.7 | 100% | 52% | 96.5% | 8335 |
| 3 | 76.3 | 99% | 56% | 96.8% | 7991 |
| 4 | 75.5 | 103% | 57% | 96.9% | 7963 |
| 5 | 69.9 | 111% | 61% | 97.3% | 7809 |
| 6 | 57.1 | 126% | 67% | 97.8% | 6721 |
| 7 | 47.3 | 150% | 69% | 97.9% | 5688 |
| 8 | 39.5 | 151% | 47% | 95.9% | 3907 |
| 9 | 42.7 | 151% | 32% | 93.9% | 3279 |
| 10 | 60.4 | 132% | 26% | 92.9% | 3777 |
| 11 | 45.8 | 165% | 16% | 90.4% | 2549 |
| 12 | 39.6 | 172% | 14% | 89.7% | 2051 |

**Table S-1e**. Data for multiple Isis 2302 phosphorothioate syntheses on reusable support **P5**

| **Synthesis** | **Loading** | **Yield of** | **Overall** | **Average** | **Crude** |
| --- | --- | --- | --- | --- | --- |
| **Number** | **(mol/g)** | **1st amidite** | **Yield** | **Yield** | **A260 units/g** |
| 1 | 34.3 | 101% | 85% | 99.1% | 2359 |
| 2 | 40.7 | 96% | 83% | 99.0% | 3262 |
| 3 | 47.3 | 97% | 85% | 99.1% | 4517 |
| 4 | 47.5 | 99% | 89% | 99.4% | 4634 |
| 5 | 47.7 | 104% | 94% | 99.6% | 5290 |
| 6 | 52.9 | 108% | 97% | 99.8% | 6421 |
| 7 | 49.0 | 121% | 106% | 100.3% | 6614 |

**Table S-1f.** Data for multiple Isis 2302 phosphorothioate syntheses on reusable support **P6**

| **Synthesis** | **Loading** | **Yield of** | **Overall** | **Average** | **Crude** |
| --- | --- | --- | --- | --- | --- |
| **Number** | **(mol/g)** | **1st amidite** | **Yield** | **Yield** | **A260 units/g** |
| 1 | 96.3 | 98% | 50% | 96.2% | 12153 |
| 2 | 119.1 | 98% | 38% | 94.7% | 11540 |
| 3 | 129.7 | 99% | 37% | 94.6% | 12627 |
| 4 | 129.3 | 97% | 37% | 94.7% | 11713 |
| 5 | 126.4 | 98% | 37% | 94.7% | 11567 |
| 6 | 123.3 | 101% | 39% | 94.9% | 11840 |
| 7 | 94.7 | 121% | 44% | 95.5% | 9880 |
| 8 | 60.3 | 158% | 44% | 95.6% | 6713 |
| 9 | 46.2 | 150% | 59% | 97.1% | 5853 |
| 10 | 34.3 | 189% | 52% | 96.4% | 4753 |
| 11 | 25.0 | 234% | 44% | 95.6% | 3540 |
| 12 | 16.8 | 264% | 45% | 95.6% | 2553 |

**Table S-1g.** Data for multiple Isis 2302 phosphorothioate syntheses on reusable support **P7**

| **Synthesis** | **Loading** | **Yield of** | **Overall** | **Average** | **Crude** |
| --- | --- | --- | --- | --- | --- |
| **Number** | **(mol/g)** | **1st amidite** | **Yield** | **Yield** | **A260 units/g** |
| 1 | 106.5 | 99% | 44% | 95.5% | 11524 |
| 2 | 110.2 | 98% | 42% | 95.3% | 11076 |
| 3 | 116.1 | 98% | 38% | 94.8% | 10579 |
| 4 | 113.2 | 96% | 37% | 94.6% | 11386 |
| 5 | 111.0 | 97% | 41% | 95.2% | 11469 |
| 6 | 104.2 | 101% | 46% | 95.7% | 11352 |
| 7 | 101.5 | 98% | 34% | 94.2% | 9979 |

**Table S-1h**. Data for multiple Isis 2302 phosphorothioate syntheses on reusable support **P9**

| **Synthesis** | **Loading** | **Yield of** | **Overall** | **Average** | **Crude** |
| --- | --- | --- | --- | --- | --- |
| **Number** | **(mol/g)** | **1st amidite** | **Yield** | **Yield** | **A260 units/g** |
| 1 | 155.2 | 82% | 28% | 93.2% | 9303 |
| 2 | 111.3 | 99% | 30% | 93.5% | 8193 |
| 3 | 106.7 | 98% | 33% | 94.0% | 7455 |
| 4 | 96.9 | 97% | 33% | 94.0% | 7621 |
| 5 | 122.1 | 97% | 22% | 91.9% | 8552 |
| 6 | 114.8 | 95% | 21% | 91.6% | 7386 |
| 7 | 95.3 | 98% | 22% | 91.8% | 5903 |

**Table S-1i**. Data for multiple Isis 2302 phosphorothioate syntheses on reusable support **P15**
